# Supplementary material
Source: PubMed Central journal article supplement (PMC1635119)

**a** Spontaneous LFP activity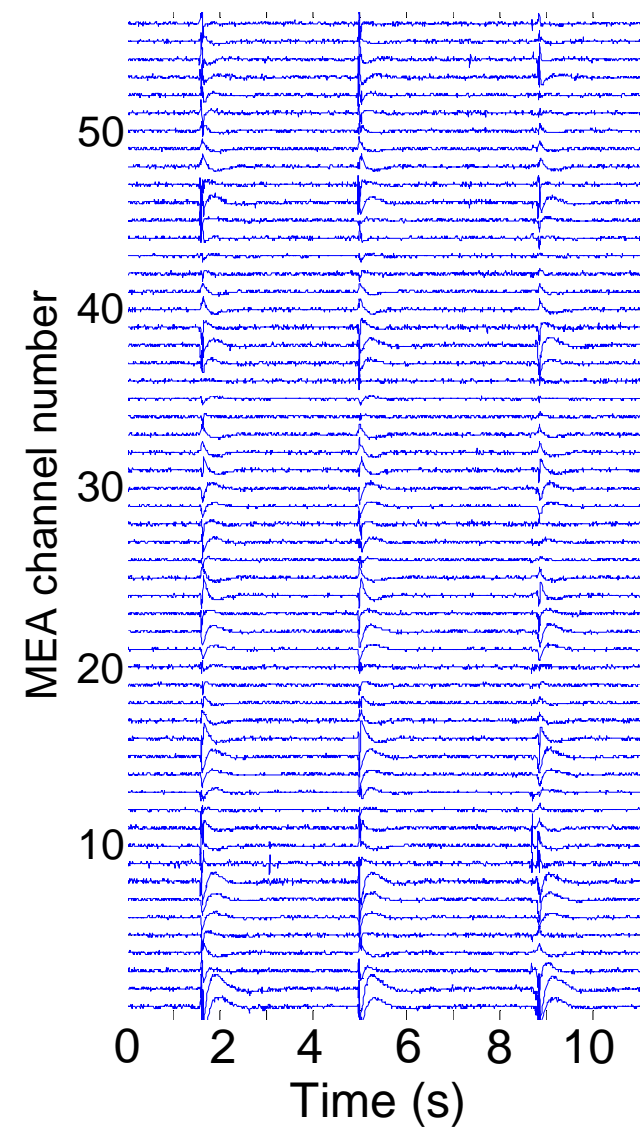**b** After TTX infusion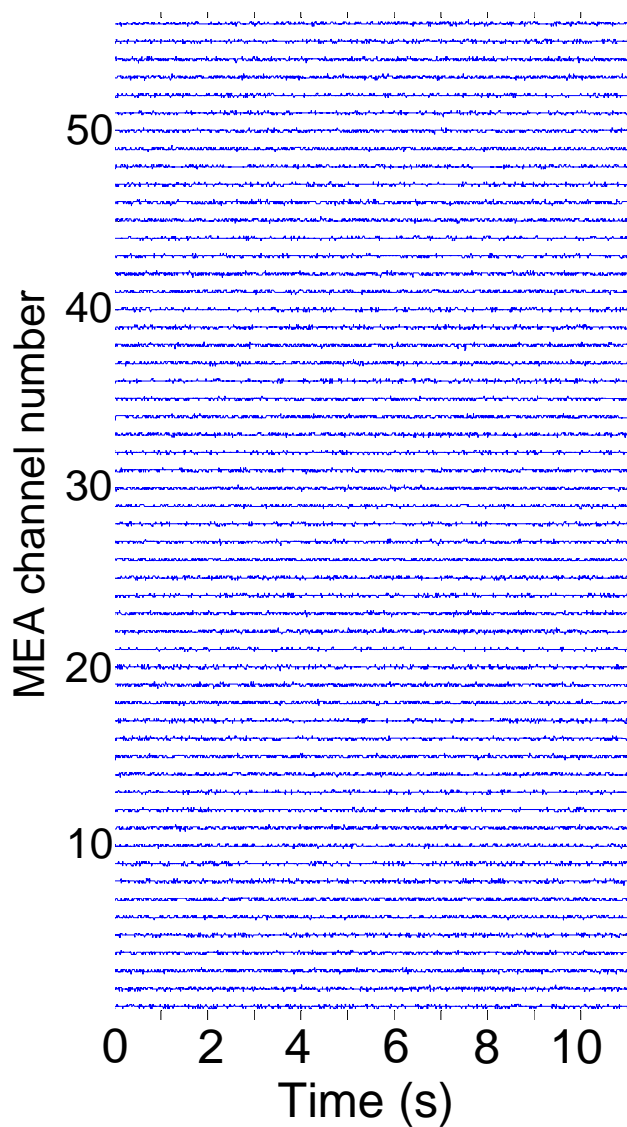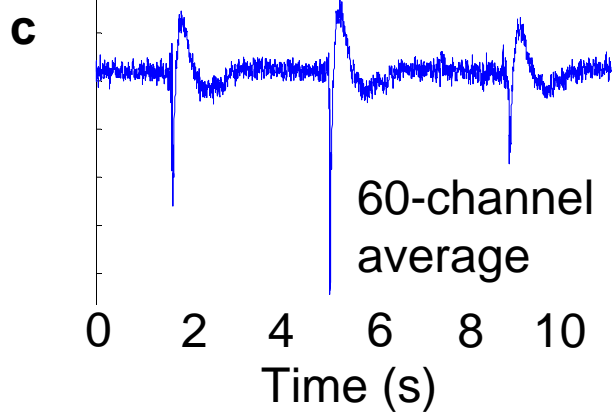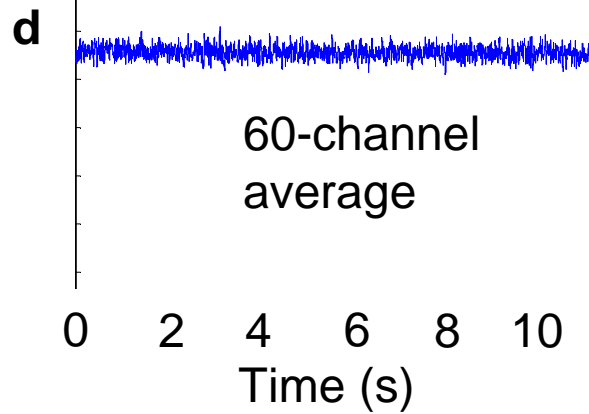

Supplement: pnas_0603219103_1.pdf [file pnas_0603219103_1.pdf]

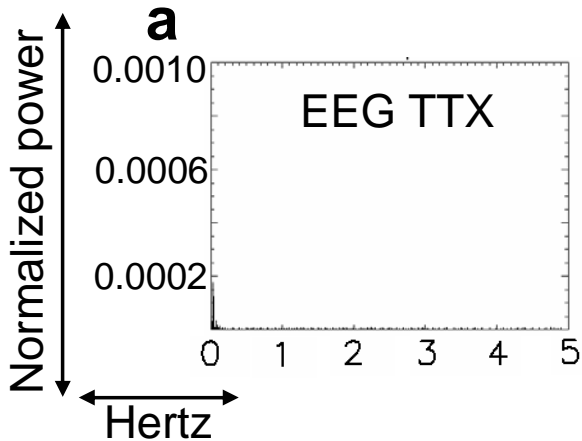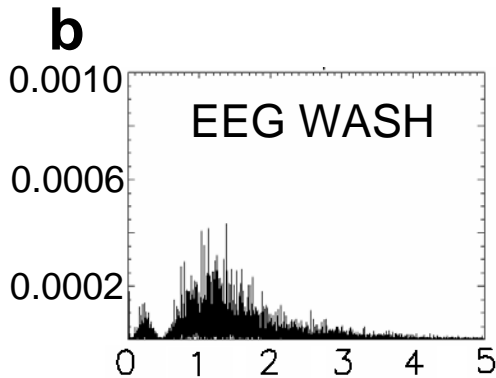

Supplement: pnas_0603219103_2.pdf [file pnas_0603219103_2.pdf]

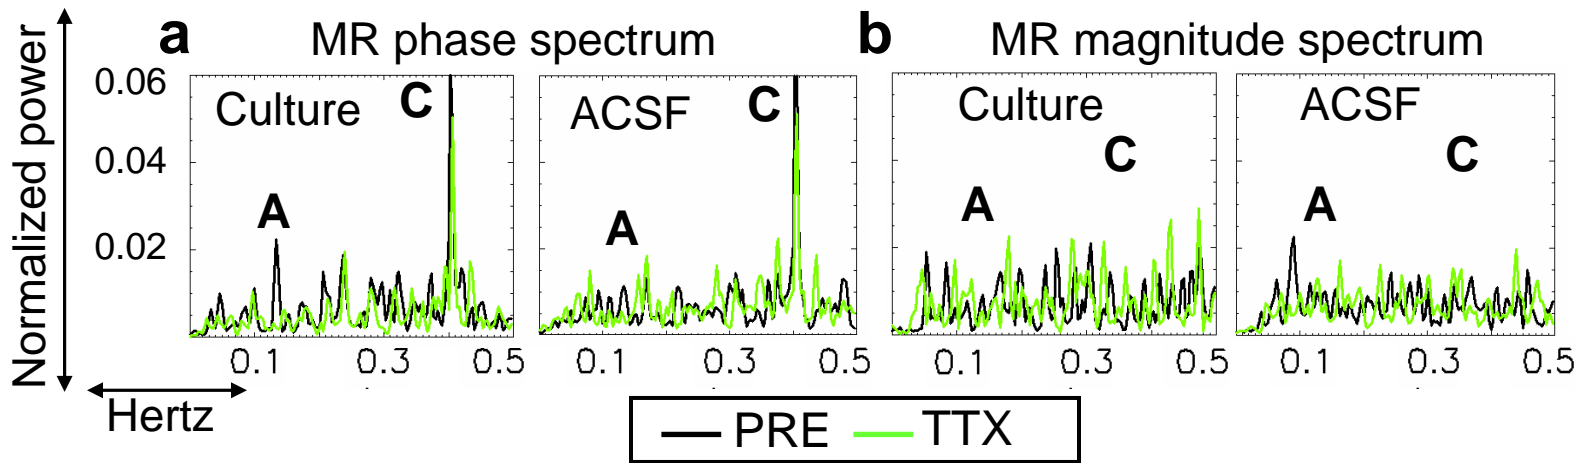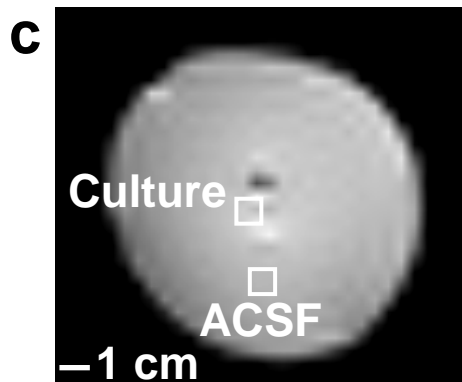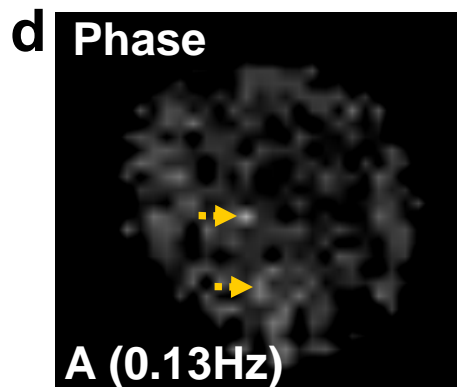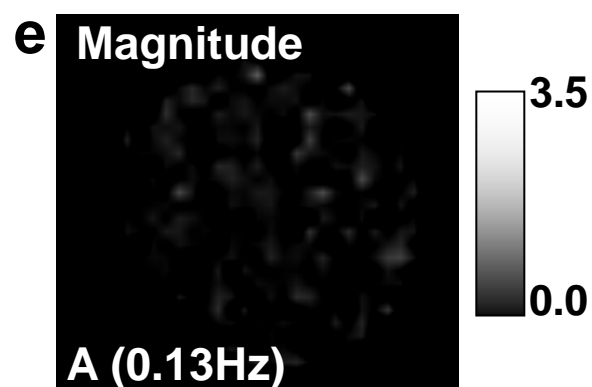

Supplement: pnas_0603219103_3.pdf [file pnas_0603219103_3.pdf]

**a**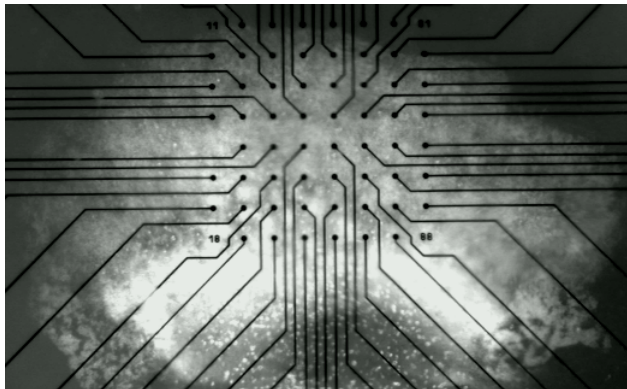**b**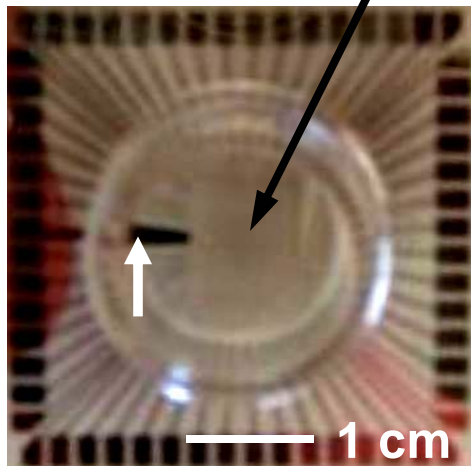**c**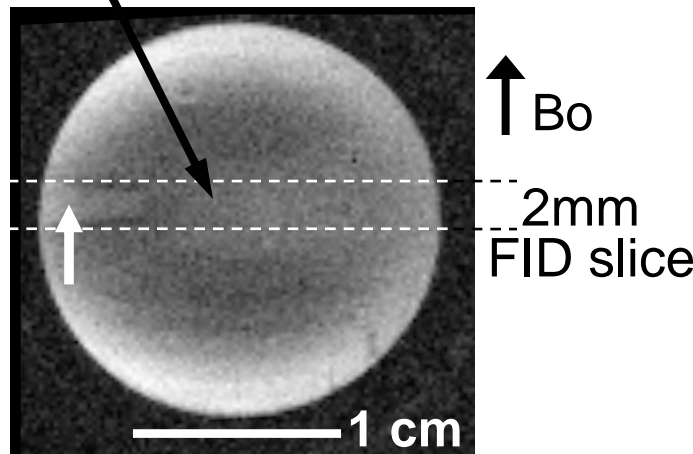

Supplement: pnas_0603219103_4.pdf [file pnas_0603219103_4.pdf]

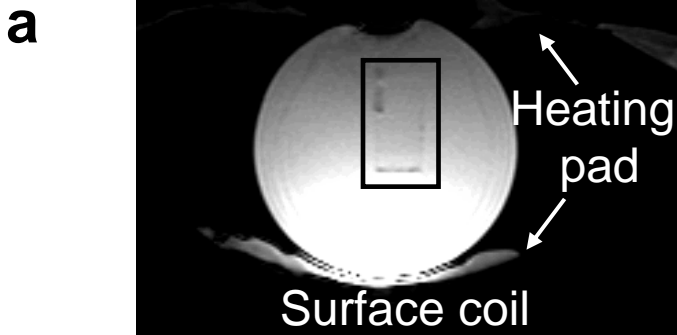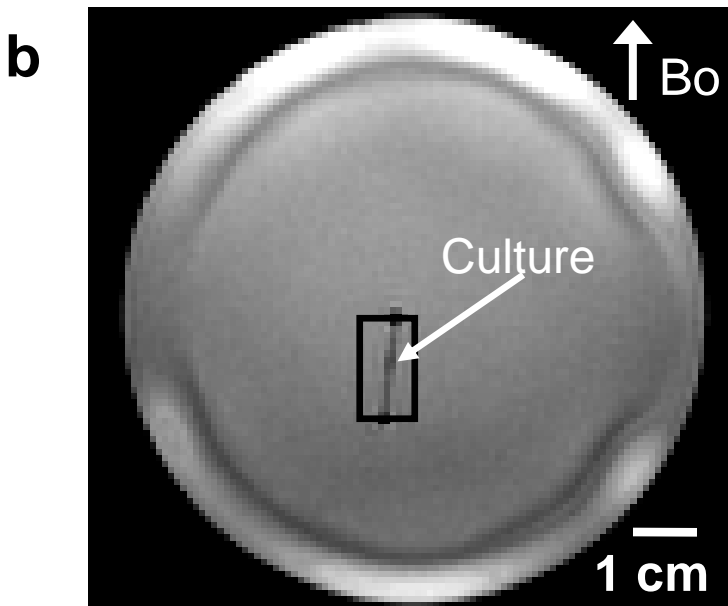

Supplement: pnas_0603219103_5.pdf [file pnas_0603219103_5.pdf]
